# Supplementary material
Source: publisher site journal article supplement (https://www.dovepress.com/article/481913)
Supplement: Supplementary file 1 [file get_supplementary_file.php]

**Supplementary Table 1: Mendelian randomization analysis of mood instability**

| SNP | chr | position | Effect allele | Other allele | Beta | SE | P |
| --- | --- | --- | --- | --- | --- | --- | --- |
| rs2000228 | 1 | 72723863 | C | T | 0.00713379 | 0.00112266 | 2.10E-10 |
| rs7536987 | 1 | 174337116 | G | A | -0.00653643 | 0.00116375 | 1.90E-08 |
| rs11184994 | 1 | 107383738 | T | C | 0.00644518 | 0.00113008 | 1.20E-08 |
| rs10210512 | 2 | 199489760 | G | T | 0.00640893 | 0.00105646 | 1.30E-09 |
| rs2678897 | 2 | 58169418 | A | G | 0.00677101 | 0.00107009 | 2.50E-10 |
| rs35789697 | 2 | 144248718 | A | G | -0.00671986 | 0.00108049 | 5.00E-10 |
| rs1439252 | 2 | 212737144 | A | G | -0.00658394 | 0.00108496 | 1.30E-09 |
| rs11712223 | 3 | 116964048 | T | C | -0.00638909 | 0.00106484 | 2.00E-09 |
| rs600011 | 3 | 107295392 | C | A | 0.00697282 | 0.00113624 | 8.40E-10 |
| rs11720128 | 3 | 134733904 | T | C | -0.00596245 | 0.00108163 | 3.50E-08 |
| rs13085679 | 3 | 49869631 | A | G | 0.00687323 | 0.00104184 | 4.20E-11 |
| rs931235 | 3 | 65155560 | C | A | -0.00610609 | 0.00106348 | 9.40E-09 |
| rs77087420 | 4 | 123122856 | G | A | -0.0127142 | 0.0022938 | 3.00E-08 |
| rs11728841 | 4 | 139096299 | C | A | 0.00584645 | 0.00105337 | 2.90E-08 |
| rs67970900 | 4 | 147748826 | T | G | -0.00668234 | 0.0011286 | 3.20E-09 |
| rs72660658 | 4 | 105443124 | T | C | -0.00682841 | 0.00117864 | 6.90E-09 |
| rs11168048 | 5 | 147842353 | C | T | -0.00612545 | 0.00105442 | 6.30E-09 |
| rs6895295 | 5 | 107757238 | T | C | 0.00707138 | 0.00127022 | 2.60E-08 |
| rs2503775 | 6 | 98521600 | G | A | -0.00903306 | 0.00155578 | 6.40E-09 |
| rs12530421 | 6 | 29549443 | C | A | 0.0121587 | 0.00208135 | 5.20E-09 |
| rs67447472 | 6 | 143062216 | T | G | 0.0110477 | 0.00175127 | 2.80E-10 |
| rs28517342 | 6 | 64763297 | G | T | -0.00657481 | 0.0011922 | 3.50E-08 |
| rs6460902 | 7 | 12255511 | A | G | 0.00647778 | 0.00105449 | 8.10E-10 |
| rs2483509 | 7 | 133341162 | A | G | 0.00642955 | 0.00104751 | 8.40E-10 |
| rs7818437 | 8 | 10209623 | C | T | 0.00911934 | 0.00123862 | 1.80E-13 |
| rs1962104 | 8 | 141635329 | C | T | 0.00729384 | 0.00105838 | 5.50E-12 |
| rs1055710 | 9 | 96214928 | A | G | -0.00661075 | 0.0011068 | 2.30E-09 |
| rs10983775 | 9 | 120521100 | T | C | -0.00688656 | 0.00104851 | 5.10E-11 |
| rs999483 | 9 | 135301389 | G | T | 0.00696129 | 0.00120401 | 7.40E-09 |
| rs7047280 | 9 | 23297808 | T | C | -0.00616673 | 0.0010682 | 7.80E-09 |
| rs56116032 | 9 | 11453149 | G | A | -0.0092383 | 0.0012615 | 2.40E-13 |
| rs4836789 | 9 | 122663466 | C | T | 0.0071769 | 0.00106327 | 1.50E-11 |
| rs11599236 | 10 | 106454672 | C | T | -0.00630634 | 0.0010685 | 3.60E-09 |
| rs297343 | 11 | 16354653 | G | T | -0.00728288 | 0.00108773 | 2.10E-11 |
| rs11039154 | 11 | 47278502 | T | C | 0.0086801 | 0.00116381 | 8.80E-14 |
| rs72995548 | 11 | 113138921 | T | C | -0.0132338 | 0.00211875 | 4.20E-10 |
| rs4309187 | 11 | 113412443 | C | A | 0.00897192 | 0.00112375 | 1.40E-15 |
| rs813469 | 12 | 52352449 | A | G | 0.00649443 | 0.00117177 | 3.00E-08 |
| rs28655666 | 12 | 122186317 | A | G | -0.00699073 | 0.00104619 | 2.40E-11 |
| rs61937595 | 12 | 57682956 | T | C | 0.0101115 | 0.00181986 | 2.80E-08 |
| rs7954112 | 12 | 16316338 | A | G | 0.00588498 | 0.00106306 | 3.10E-08 |
| rs3012850 | 13 | 58713360 | G | C | 0.00929455 | 0.00124061 | 6.80E-14 |
| rs9517313 | 13 | 99105892 | C | G | 0.00644955 | 0.0010723 | 1.80E-09 |
| rs57248843 | 13 | 66537882 | T | A | 0.00995164 | 0.00148614 | 2.10E-11 |
| rs4899532 | 14 | 75174132 | G | A | 0.00781697 | 0.00119642 | 6.40E-11 |
| rs2016851 | 14 | 71697878 | C | T | 0.00629884 | 0.00115173 | 4.50E-08 |
| rs4243048 | 15 | 78010060 | A | G | -0.00639065 | 0.00106913 | 2.30E-09 |
| rs1050863 | 16 | 87440895 | A | G | -0.00760029 | 0.00105494 | 5.80E-13 |
| rs35856211 | 16 | 74138900 | A | G | -0.00655792 | 0.00105113 | 4.40E-10 |
| rs7202252 | 16 | 24741686 | C | T | 0.00732897 | 0.00117803 | 4.90E-10 |
| rs55774086 | 16 | 5844481 | G | C | 0.00769201 | 0.00121579 | 2.50E-10 |
| rs55938136 | 17 | 43798360 | G | A | 0.0115678 | 0.00124736 | 1.80E-20 |
| rs62056909 | 17 | 43783803 | G | A | 0.0117379 | 0.00124909 | 5.60E-21 |
| rs613872 | 18 | 53210302 | T | G | 0.0109425 | 0.00137527 | 1.80E-15 |
| rs1153637 | 18 | 52972210 | G | T | 0.00826391 | 0.00107495 | 1.50E-14 |
| rs11877496 | 18 | 50828902 | T | C | 0.00702339 | 0.00104533 | 1.80E-11 |
| rs11665070 | 18 | 35152563 | A | G | -0.00844116 | 0.00110833 | 2.60E-14 |
| rs34961470 | 18 | 52763194 | G | A | 0.0059554 | 0.00109069 | 4.80E-08 |
| rs1688000 | 19 | 35619166 | G | A | -0.00633205 | 0.00107893 | 4.40E-09 |
| rs4578918 | 20 | 44721656 | C | T | -0.00690059 | 0.00118852 | 6.40E-09 |
| rs6103271 | 20 | 42015848 | G | A | -0.00905928 | 0.00138265 | 5.70E-11 |
| rs926914 | 22 | 41418154 | T | C | 0.00808591 | 0.00115314 | 2.30E-12 |

Abbreviation: SNP, single nucleotide polymorphism; Chr, chromosome; SE, standard error.

**Supplementary Table 2: Mendelian randomization analysis of mood instability and COPD.**

| SNP | Chr | position | Effect allele | Other allele | Beta | SE | P | F |
| --- | --- | --- | --- | --- | --- | --- | --- | --- |
| rs11184994 | 1 | 107383738 | T | C | -1.68E-05 | 0.000132529 | 0.9 | 32.53 |
| rs1153637 | 18 | 52972210 | G | T | 0.000229081 | 0.000125982 | 0.07 | 59.10 |
| rs11712223 | 3 | 116964048 | T | C | -0.000156572 | 0.000124843 | 0.21 | 36.00 |
| rs11728841 | 4 | 139096299 | C | A | 0.000141502 | 0.00012351 | 0.25 | 30.81 |
| rs1439252 | 2 | 212737144 | A | G | -0.000196623 | 0.00012721 | 0.12 | 36.83 |
| rs1688000 | 19 | 35619166 | G | A | 6.00E-05 | 0.000126451 | 0.64 | 34.44 |
| rs2000228 | 1 | 72723863 | C | T | 5.55E-05 | 0.000131662 | 0.67 | 40.38 |
| rs2016851 | 14 | 71697878 | C | T | 0.000286416 | 0.00013497 | 0.03 | 29.91 |
| rs28517342 | 6 | 64763297 | G | T | -0.000262198 | 0.000139795 | 0.06 | 30.41 |
| rs28655666 | 12 | 122186317 | A | G | 1.74E-05 | 0.000122633 | 0.89 | 44.65 |
| rs3012850 | 13 | 58713360 | G | C | -7.21E-05 | 0.00014538 | 0.62 | 56.13 |
| rs35856211 | 16 | 74138900 | A | G | -7.73E-05 | 0.000123192 | 0.53 | 38.92 |
| rs4836789 | 9 | 122663466 | C | T | -6.45E-05 | 0.000124625 | 0.61 | 45.56 |
| rs4899532 | 14 | 75174132 | G | A | 1.41E-06 | 0.000140192 | 0.99 | 42.69 |
| rs55938136 | 17 | 43798360 | G | A | 0.000106542 | 0.000146189 | 0.47 | 86.00 |
| rs62056909 | 17 | 43783803 | G | A | 0.000107 | 0.000146392 | 0.46 | 88.31 |
| rs6895295 | 5 | 107814646 | T | C | -0.000117663 | 0.000148439 | 0.43 | 30.99 |
| rs7047280 | 9 | 23297808 | T | C | 6.80E-05 | 0.000125206 | 0.59 | 33.33 |
| rs7954112 | 12 | 16316338 | A | G | 0.000150945 | 0.000124577 | 0.23 | 30.65 |
| rs813469 | 12 | 52352449 | A | G | -1.61E-05 | 0.000137353 | 0.91 | 30.72 |
| rs9517313 | 13 | 99105892 | C | G | 5.46E-06 | 0.000125649 | 0.97 | 36.18 |
| rs999483 | 9 | 135301389 | G | T | -9.13E-05 | 0.000141156 | 0.52 | 33.43 |

**Supplementary Table 3: Mendelian randomization analysis of mood instability and lung cancer.**

| SNP | Chr | position | Effect allele | Other allele | Beta | SE | P | F |
| --- | --- | --- | --- | --- | --- | --- | --- | --- |
| rs11184994 | 1 | 107383738 | T | C | -0.0164 | 0.0185 | 0.37 | 32.53 |
| rs11712223 | 3 | 116964048 | T | C | -0.009 | 0.0196 | 0.64 | 36.00 |
| rs11728841 | 4 | 139096299 | C | A | 0.0021 | 0.016 | 0.90 | 30.81 |
| rs12530421 | 6 | 29549443 | C | A | 0.0898 | 0.0249 | <0.01 | 34.13 |
| rs1439252 | 2 | 212737144 | A | G | -0.0017 | 0.0166 | 0.92 | 36.83 |
| rs1688000 | 19 | 35619166 | G | A | -0.0114 | 0.0168 | 0.50 | 34.44 |
| rs2016851 | 14 | 71697878 | C | T | -0.0178 | 0.017 | 0.30 | 29.91 |
| rs2503775 | 6 | 98521600 | G | A | -0.0157 | 0.0215 | 0.47 | 33.71 |
| rs28517342 | 6 | 64763297 | G | T | 0.009 | 0.0187 | 0.63 | 30.41 |
| rs28655666 | 12 | 122186317 | A | G | -0.0316 | 0.0159 | 0.05 | 44.65 |
| rs3012850 | 13 | 58713360 | G | C | 0.034 | 0.0205 | 0.10 | 56.13 |
| rs35856211 | 16 | 74138900 | A | G | -0.0143 | 0.0164 | 0.38 | 38.92 |
| rs4836789 | 9 | 122663466 | C | T | -0.0304 | 0.0173 | 0.08 | 45.56 |
| rs4899532 | 14 | 75174132 | G | A | 0.0275 | 0.027 | 0.31 | 42.69 |
| rs55938136 | 17 | 43798360 | G | A | -0.0277 | 0.0322 | 0.39 | 86.00 |
| rs56116032 | 9 | 11453149 | G | A | -0.0074 | 0.0288 | 0.80 | 53.63 |
| rs613872 | 18 | 53210302 | T | G | 0.0144 | 0.0311 | 0.64 | 63.31 |
| rs67447472 | 6 | 143062216 | T | G | 0.0054 | 0.0225 | 0.81 | 39.80 |
| rs6895295 | 5 | 107757238 | T | C | -0.0021 | 0.025 | 0.93 | 30.99 |
| rs7047280 | 9 | 23297808 | T | C | -0.0047 | 0.0167 | 0.78 | 33.33 |
| rs72995548 | 11 | 113138921 | T | C | -0.0344 | 0.0507 | 0.50 | 39.01 |
| rs7954112 | 12 | 16316338 | A | G | 0.0297 | 0.0175 | 0.09 | 30.65 |
| rs813469 | 12 | 52352449 | A | G | -0.0732 | 0.0179 | 4E-05 | 30.72 |
| rs9517313 | 13 | 99105892 | C | G | -0.0056 | 0.0161 | 0.73 | 36.18 |
| rs999483 | 9 | 135301389 | G | T | -0.0051 | 0.0186 | 0.78 | 33.43 |

Abbreviation: SNP, single nucleotide polymorphism; Chr, chromosome; SE, standard error.

**Supplementary Table 4: Mendelian randomization analysis of mood instability and pulmonary embolism.**

| SNP | Chr | position | Effect allele | Other allele | Beta | SE | P | F |
| --- | --- | --- | --- | --- | --- | --- | --- | --- |
| rs11184994 | 1 | 107383738 | T | C | 2.91E-05 | 0.000204184 | 0.89 | 32.53 |
| rs11712223 | 3 | 116964048 | T | C | 0.00041727 | 0.000192347 | 0.03 | 36.00 |
| rs11728841 | 4 | 139096299 | C | A | -0.000145884 | 0.00019029 | 0.44 | 30.81 |
| rs1439252 | 2 | 212737144 | A | G | 3.81E-05 | 0.000195994 | 0.85 | 36.83 |
| rs1688000 | 19 | 35619166 | G | A | 0.000264217 | 0.000194826 | 0.18 | 34.44 |
| rs2016851 | 14 | 71697878 | C | T | 0.000317459 | 0.000207948 | 0.13 | 29.91 |
| rs2503775 | 6 | 98521600 | G | A | 0.000186186 | 0.000280892 | 0.51 | 33.71 |
| rs28517342 | 6 | 64763297 | G | T | -0.000201176 | 0.000215383 | 0.35 | 30.41 |
| rs3012850 | 13 | 58713360 | G | C | -6.13E-05 | 0.000223987 | 0.78 | 56.13 |
| rs35856211 | 16 | 74138900 | A | G | -9.39E-05 | 0.000189802 | 0.62 | 38.92 |
| rs4836789 | 9 | 122663466 | C | T | 0.000338293 | 0.000192008 | 0.08 | 45.56 |
| rs55774086 | 16 | 5844481 | G | C | 0.000314734 | 0.000219499 | 0.15 | 40.03 |
| rs613872 | 18 | 53210302 | T | G | 4.68E-05 | 0.000248368 | 0.85 | 63.31 |
| rs62056909 | 17 | 43783803 | G | A | 0.000522918 | 0.000225547 | 0.02 | 88.31 |
| rs67447472 | 6 | 143062216 | T | G | -0.000173388 | 0.000316315 | 0.58 | 39.80 |
| rs6895295 | 5 | 107757238 | T | C | 0.000208695 | 0.000229422 | 0.36 | 30.99 |
| rs7047280 | 9 | 23297808 | T | C | -2.22E-05 | 0.000192904 | 0.91 | 33.33 |
| rs7954112 | 12 | 16316338 | A | G | -6.35E-05 | 0.000191936 | 0.74 | 30.65 |
| rs813469 | 12 | 52352449 | A | G | 9.31E-05 | 0.00021162 | 0.66 | 30.72 |
| rs9517313 | 13 | 99105892 | C | G | 6.55E-05 | 0.000193587 | 0.74 | 36.18 |
| rs999483 | 9 | 135301389 | G | T | -3.78E-05 | 0.000217477 | 0.86 | 33.43 |

Abbreviation: SNP, single nucleotide polymorphism; Chr, chromosome; SE, standard error.

**Supplementary Table 5: Mendelian randomization analysis of mood instability and pulmonary fibrosis.**

| SNP | Chr | position | Effect allele | Other allele | Beta | SE | P | F |
| --- | --- | --- | --- | --- | --- | --- | --- | --- |
| rs11184994 | 1 | 107383738 | T | C | 0.0398 | 0.0385 | 0.30 | 32.53 |
| rs11712223 | 3 | 116964048 | T | C | -0.0234 | 0.0361 | 0.517 | 36.00 |
| rs11728841 | 4 | 139096299 | C | A | -0.0277 | 0.0351 | 0.43 | 30.81 |
| rs12530421 | 6 | 29549443 | C | A | -0.0378 | 0.0725 | 0.60 | 34.13 |
| rs1439252 | 2 | 212737144 | A | G | 0.0394 | 0.0365 | 0.28 | 36.83 |
| rs2016851 | 14 | 71697878 | C | T | -0.0079 | 0.0379 | 0.84 | 29.91 |
| rs2503775 | 6 | 98521600 | G | A | -0.0677 | 0.0523 | 0.20 | 33.71 |
| rs28517342 | 6 | 64763297 | G | T | 0.0075 | 0.0406 | 0.85 | 30.41 |
| rs28655666 | 12 | 122186317 | A | G | -3.00E-04 | 0.0348 | 0.99 | 44.65 |
| rs3012850 | 13 | 58713360 | G | C | 0.0989 | 0.042 | 0.02 | 56.13 |
| rs35856211 | 16 | 74138900 | A | G | -0.0717 | 0.0351 | 0.04 | 38.92 |
| rs4836789 | 9 | 122663466 | C | T | -0.0366 | 0.0358 | 0.31 | 45.56 |
| rs4899532 | 14 | 75174132 | G | A | 0.0128 | 0.0419 | 0.76 | 42.69 |
| rs613872 | 18 | 53210302 | T | G | 0.0098 | 0.0483 | 0.84 | 63.31 |
| rs67447472 | 6 | 143062216 | T | G | -0.0398 | 0.0591 | 0.50 | 39.80 |
| rs6895295 | 5 | 107757238 | T | C | -0.0019 | 0.0449 | 0.97 | 30.99 |
| rs7047280 | 9 | 23297808 | T | C | 0.0446 | 0.0357 | 0.21 | 33.33 |
| rs72995548 | 11 | 113138921 | T | C | -0.1064 | 0.0809 | 0.19 | 39.01 |
| rs7954112 | 12 | 16316338 | A | G | 0.0315 | 0.0359 | 0.38 | 30.65 |
| rs813469 | 12 | 52352449 | A | G | 0.0192 | 0.0457 | 0.68 | 30.72 |
| rs9517313 | 13 | 99105892 | C | G | -0.0107 | 0.0355 | 0.76 | 36.18 |
| rs999483 | 9 | 135301389 | G | T | 0.0658 | 0.0402 | 0.10 | 33.43 |

Abbreviation: SNP, single nucleotide polymorphism; Chr, chromosome; SE, standard error.

**Supplementary Table 6: Mendelian randomization analysis of mood instability and pneumonia.**

| SNP | Chr | position | Effect allele | Other allele | Beta | SE | P | F |
| --- | --- | --- | --- | --- | --- | --- | --- | --- |
| rs10210512 | 2 | 199489760 | G | T | -0.00259737 | 0.0100479 | 0.80 | 36.80 |
| rs1050863 | 16 | 87440895 | A | G | -0.0162491 | 0.0100519 | 0.11 | 51.90 |
| rs1055710 | 9 | 96217447 | A | G | -0.00687726 | 0.0105275 | 0.51 | 35.67 |
| rs10983775 | 9 | 120521100 | T | C | -0.00979827 | 0.00997562 | 0.33 | 43.14 |
| rs11168048 | 5 | 147842353 | C | T | 0.00376804 | 0.0100229 | 0.71 | 33.75 |
| rs11184994 | 1 | 107383738 | T | C | 0.00843631 | 0.0107361 | 0.43 | 32.53 |
| rs1153637 | 18 | 52972210 | G | T | 0.0128317 | 0.0102209 | 0.21 | 59.10 |
| rs11599236 | 10 | 106454672 | C | T | -0.00330443 | 0.0101702 | 0.75 | 34.83 |
| rs11665070 | 18 | 35152563 | A | G | -0.0152727 | 0.0105311 | 0.15 | 58.01 |
| rs11712223 | 3 | 116964048 | T | C | 0.00155001 | 0.010133 | 0.88 | 36.00 |
| rs11720128 | 3 | 134733904 | T | C | 0.00167129 | 0.0102845 | 0.87 | 30.39 |
| rs11728841 | 4 | 139097917 | C | A | -0.0211926 | 0.00997692 | 0.03 | 30.81 |
| rs11877496 | 18 | 50828902 | T | C | 0.00310883 | 0.00993387 | 0.75 | 45.14 |
| rs12530421 | 6 | 29549443 | C | A | -0.0207102 | 0.0198526 | 0.30 | 34.13 |
| rs1439252 | 2 | 212746350 | A | G | -0.00168488 | 0.0103071 | 0.87 | 36.83 |
| rs1688000 | 19 | 35619166 | G | A | -0.0104224 | 0.0102573 | 0.31 | 34.44 |
| rs1962104 | 8 | 141635329 | C | T | -0.00495519 | 0.0100535 | 0.62 | 47.49 |
| rs2000228 | 1 | 72723863 | C | T | 0.00440061 | 0.0106719 | 0.68 | 40.38 |
| rs2016851 | 14 | 71697878 | C | T | 0.0090677 | 0.0109588 | 0.41 | 29.91 |
| rs2483509 | 7 | 133341162 | A | G | -0.00859504 | 0.00995549 | 0.39 | 37.67 |
| rs2503775 | 6 | 98521600 | G | A | 0.000521286 | 0.0147652 | 0.97 | 33.71 |
| rs2678897 | 2 | 58169418 | A | G | 0.0106653 | 0.0101747 | 0.29 | 40.04 |
| rs28517342 | 6 | 64763297 | G | T | -0.012697 | 0.0113503 | 0.26 | 30.41= |
| rs28655666 | 12 | 122186317 | A | G | -0.0197095 | 0.00994024 | 0.05 | 44.65= |
| rs297343 | 11 | 16354653 | G | T | 0.00671645 | 0.010339 | 0.52 | 44.83 |
| rs34961470 | 18 | 52763194 | G | A | 0.00550948 | 0.0103626 | 0.59 | 29.81 |
| rs35789697 | 2 | 144248718 | A | G | -0.0329277 | 0.0102686 | 0.001 | 38.68 |
| rs35856211 | 16 | 74138900 | A | G | -0.00993614 | 0.0099874 | 0.32 | 38.92 |
| rs4309187 | 11 | 113412443 | C | A | 0.0130593 | 0.0106799 | 0.22 | 63.74 |
| rs4578918 | 20 | 44724305 | C | T | 0.0044363 | 0.0113108 | 0.69 | 33.71 |
| rs4836789 | 9 | 122663466 | C | T | 0.0164597 | 0.0101027 | 0.10 | 45.56 |
| rs55774086 | 16 | 5844481 | G | C | -0.00128135 | 0.0115495 | 0.91 | 40.03 |
| rs56116032 | 9 | 11453149 | G | A | 0.0165714 | 0.011985 | 0.17 | 53.63 |
| rs57248843 | 13 | 66537882 | T | A | 0.00385026 | 0.0141015 | 0.78 | 44.84 |
| rs600011 | 3 | 107295392 | C | A | -0.00259978 | 0.0108211 | 0.81 | 37.66 |
| rs6103271 | 20 | 42015848 | G | A | 0.00362645 | 0.0131414 | 0.78 | 42.93 |
| rs61937595 | 12 | 57682956 | T | C | 0.0440292 | 0.017331 | 0.01 | 30.87 |
| rs62056909 | 17 | 43783803 | G | A | -0.00581039 | 0.0118635 | 0.62 | 88.31 |
| rs6460902 | 7 | 12255511 | A | G | -0.00587532 | 0.0100238 | 0.56 | 37.74 |
| rs67447472 | 6 | 143062216 | T | G | 0.0140937 | 0.0166429 | 0.40 | 39.80 |
| rs67970900 | 4 | 147748826 | T | G | -2.44E-05 | 0.0107305 | 1.00 | 35.06 |
| rs6895295 | 5 | 107757238 | T | C | 0.00302592 | 0.0120761 | 0.80 | 30.99 |
| rs7047280 | 9 | 23297808 | T | C | 0.0130909 | 0.0101478 | 0.20 | 33.33 |
| rs7202252 | 16 | 24741686 | C | T | 0.0164048 | 0.0112019 | 0.14 | 38.71 |
| rs72660658 | 4 | 105443124 | T | C | -0.00429198 | 0.0112 | 0.70 | 33.56 |
| rs72995548 | 11 | 113138921 | T | C | -0.0229692 | 0.0200825 | 0.25 | 39.01 |
| rs7536987 | 1 | 174337116 | G | A | -0.00479963 | 0.0110644 | 0.66 | 31.55 |
| rs77087420 | 4 | 123122856 | G | A | -0.0261795 | 0.0217502 | 0.23 | 30.72 |
| rs7954112 | 12 | 16316338 | A | G | -0.0102756 | 0.0100998 | 0.31 | 30.65 |
| rs813469 | 12 | 52381026 | A | G | 0.0109687 | 0.0112922 | 0.33 | 30.72 |
| rs931235 | 3 | 65155560 | C | A | 0.00634798 | 0.0101162 | 0.53 | 32.97 |
| rs9517313 | 13 | 99109816 | C | G | 0.0202971 | 0.0101983 | 0.05 | 36.18 |
| rs999483 | 9 | 135301389 | G | T | -0.0284159 | 0.0114386 | 0.01 | 33.43 |

Abbreviation: SNP, single nucleotide polymorphism; Chr, chromosome; SE, standard error.

**Supplementary Table 7: Mendelian randomization analysis of mood instability and pneumonia.**

| SNP | Chr | position | Effect allele | Other allele | Beta | SE | P | F |
| --- | --- | --- | --- | --- | --- | --- | --- | --- |
| rs10210512 | 2 | 199489760 | G | T | 0.000174908 | 0.00147027 | 0.91 | 36.80 |
| rs1050863 | 16 | 87440895 | A | G | -0.000311126 | 0.00146459 | 0.83 | 51.90 |
| rs1055710 | 9 | 96214928 | A | G | -0.000820669 | 0.00153359 | 0.59 | 35.67 |
| rs10983775 | 9 | 120521100 | T | C | 0.00106102 | 0.00145714 | 0.47 | 43.14 |
| rs11039154 | 11 | 47278502 | T | C | -0.0014469 | 0.00161171 | 0.37 | 55.63 |
| rs11168048 | 5 | 147842353 | C | T | -0.00037742 | 0.00146186 | 0.8 | 33.75 |
| rs11184994 | 1 | 107383738 | T | C | -0.00149435 | 0.00156275 | 0.34 | 32.53 |
| rs1153637 | 18 | 52972210 | G | T | -0.00130398 | 0.00149308 | 0.38 | 59.10 |
| rs11599236 | 10 | 106454672 | C | T | -0.00300524 | 0.00147995 | 0.04 | 34.83 |
| rs11665070 | 18 | 35152563 | A | G | -0.00359067 | 0.00154405 | 0.02 | 58.01 |
| rs11712223 | 3 | 116964048 | T | C | -0.00143779 | 0.00147764 | 0.33 | 36.00 |
| rs11720128 | 3 | 134733904 | T | C | -0.0015816 | 0.00150292 | 0.29 | 30.39 |
| rs11728841 | 4 | 139096299 | C | A | 0.00107753 | 0.00146094 | 0.46 | 30.81 |
| rs11877496 | 18 | 50828902 | T | C | 0.000413028 | 0.00145155 | 0.78 | 45.14 |
| rs12530421 | 6 | 29549443 | C | A | -0.0040984 | 0.00290903 | 0.16 | 34.13 |
| rs13085679 | 3 | 49869631 | A | G | 0.00275738 | 0.00144565 | 0.06 | 43.52 |
| rs1439252 | 2 | 212737144 | A | G | -0.0017321 | 0.00150271 | 0.25 | 36.83 |
| rs1688000 | 19 | 35619166 | G | A | 0.000331641 | 0.00149283 | 0.82 | 34.44 |
| rs1962104 | 8 | 141635329 | C | T | 0.0020767 | 0.00146583 | 0.16 | 47.49 |
| rs2000228 | 1 | 72723863 | C | T | -0.00395936 | 0.00156196 | 0.01 | 40.38 |
| rs2016851 | 14 | 71697878 | C | T | 0.00113061 | 0.00159591 | 0.48 | 29.91 |
| rs2483509 | 7 | 133341162 | A | G | -0.000680063 | 0.00145409 | 0.64 | 37.67 |
| rs2503775 | 6 | 98521600 | G | A | -0.00292729 | 0.0021677 | 0.18 | 33.71 |
| rs2678897 | 2 | 58169418 | A | G | 0.001999 | 0.00148323 | 0.18 | 40.04 |
| rs28517342 | 6 | 64763297 | G | T | -0.00348803 | 0.00165358 | 0.04 | 30.41 |
| rs28655666 | 12 | 122186317 | A | G | -0.000411787 | 0.00145638 | 0.78 | 44.65 |
| rs297343 | 11 | 16354653 | G | T | -0.00079771 | 0.0015112 | 0.6 | 44.83 |
| rs3012850 | 13 | 58713360 | G | C | 0.00253212 | 0.00173263 | 0.14 | 56.13 |
| rs34961470 | 18 | 52763194 | G | A | 0.000566703 | 0.00151496 | 0.71 | 29.81 |
| rs35789697 | 2 | 144248718 | A | G | 0.000995977 | 0.00149628 | 0.51 | 38.68 |
| rs35856211 | 16 | 74138900 | A | G | 0.000691957 | 0.0014629 | 0.64 | 38.92 |
| rs4243048 | 15 | 78010060 | A | G | 4.94E-05 | 0.00148976 | 0.97 | 35.73 |
| rs4309187 | 11 | 113412443 | C | A | 0.00172744 | 0.00155512 | 0.27 | 63.74 |
| rs4578918 | 20 | 44721656 | C | T | -0.000516684 | 0.00165285 | 0.75 | 33.71 |
| rs4836789 | 9 | 122663466 | C | T | -0.000619497 | 0.00147404 | 0.67 | 45.56 |
| rs4899532 | 14 | 75174132 | G | A | 0.000704316 | 0.00165327 | 0.67 | 42.69 |
| rs55774086 | 16 | 5844481 | G | C | 7.46E-05 | 0.00168905 | 0.96 | 40.03 |
| rs55938136 | 17 | 43798360 | G | A | -0.00216482 | 0.00173848 | 0.21 | 86.00 |
| rs56116032 | 9 | 11453149 | G | A | -0.00164069 | 0.00174816 | 0.35 | 53.63 |
| rs57248843 | 13 | 66537882 | T | A | 0.00399592 | 0.0020551 | 0.05 | 44.84 |
| rs600011 | 3 | 107295392 | C | A | -0.000413268 | 0.00157902 | 0.79 | 37.66 |
| rs6103271 | 20 | 42015848 | G | A | -0.000960047 | 0.00193478 | 0.62 | 42.93 |
| rs613872 | 18 | 53210302 | T | G | -0.000900679 | 0.00189442 | 0.63 | 63.31 |
| rs61937595 | 12 | 57682956 | T | C | 0.00688209 | 0.00252687 | 0.006 | 30.87 |
| rs62056909 | 17 | 43783803 | G | A | -0.00225254 | 0.00174039 | 0.2 | 88.31 |
| rs6460902 | 7 | 12255511 | A | G | 0.000961087 | 0.00146246 | 0.51 | 37.74 |
| rs67447472 | 6 | 143062216 | T | G | 0.000238258 | 0.00243537 | 0.92 | 39.80 |
| rs67970900 | 4 | 147748826 | T | G | 0.000319244 | 0.0015617 | 0.84 | 35.06 |
| rs6895295 | 5 | 107757238 | T | C | 0.000379681 | 0.00177019 | 0.83 | 30.99 |
| rs7047280 | 9 | 23297808 | T | C | 0.00075487 | 0.00148522 | 0.61 | 33.33 |
| rs7202252 | 16 | 24741686 | C | T | 0.00223039 | 0.00162901 | 0.17 | 38.71 |
| rs72660658 | 4 | 105443124 | T | C | -0.00372548 | 0.00163516 | 0.02 | 33.56 |
| rs72995548 | 11 | 113138921 | T | C | 0.000198662 | 0.00292795 | 0.95 | 39.01 |
| rs7536987 | 1 | 174337116 | G | A | -0.000419535 | 0.00160857 | 0.79 | 31.55 |
| rs77087420 | 4 | 123122856 | G | A | -0.00635302 | 0.00315978 | 0.04 | 30.72 |
| rs7818437 | 8 | 10209623 | C | T | 0.00184437 | 0.00171628 | 0.28 | 54.21 |
| rs7954112 | 12 | 16316338 | A | G | -0.00196333 | 0.00147259 | 0.18 | 30.65 |
| rs813469 | 12 | 52352449 | A | G | 0.00174452 | 0.00162726 | 0.28 | 30.72 |
| rs926914 | 22 | 41418154 | T | C | -0.000414816 | 0.00159833 | 0.8 | 49.17 |
| rs931235 | 3 | 65155560 | C | A | -0.00219742 | 0.00147705 | 0.14 | 32.97 |
| rs9517313 | 13 | 99105892 | C | G | 0.00197227 | 0.00148973 | 0.19 | 36.18 |
| rs999483 | 9 | 135301389 | G | T | 0.00245458 | 0.00166523 | 0.14 | 33.43 |

Abbreviation: SNP, single nucleotide polymorphism; Chr, chromosome; SE, standard error.

**Supplementary Table 8: Mendelian randomization analysis of mood instability and asthma.**

| SNP | Chr | position | Effect allele | Other allele | Beta | SE | P | F |
| --- | --- | --- | --- | --- | --- | --- | --- | --- |
| rs10210512 | 2 | 199489760 | G | T | -0.000299254 | 0.00067095 | 0.66 | 36.80 |
| rs1050863 | 16 | 87440895 | A | G | -0.000403131 | 0.000669805 | 0.55 | 51.90 |
| rs1055710 | 9 | 96214928 | A | G | -0.00181261 | 0.000703028 | 0.011 | 35.67 |
| rs10983775 | 9 | 120521100 | T | C | -0.000831894 | 0.000665744 | 0.21 | 43.14 |
| rs1153637 | 18 | 52972210 | G | T | 0.000131743 | 0.000682727 | 0.85 | 59.10 |
| rs11599236 | 10 | 106454672 | C | T | -0.0012788 | 0.000678429 | 0.06 | 34.83 |
| rs11712223 | 3 | 116964048 | T | C | -0.000976727 | 0.000676182 | 0.15 | 36.00 |
| rs1688000 | 19 | 35619166 | G | A | -0.000264915 | 0.000685209 | 0.7 | 34.44 |
| rs1962104 | 8 | 141635329 | C | T | -6.93E-05 | 0.000672134 | 0.92 | 47.49 |
| rs2000228 | 1 | 72723863 | C | T | 0.000326931 | 0.000712972 | 0.65 | 40.38 |
| rs2016851 | 14 | 71697878 | C | T | 0.000468385 | 0.000731473 | 0.52 | 29.91 |
| rs2483509 | 7 | 133341162 | A | G | -0.000901797 | 0.000665265 | 0.18 | 37.67 |
| rs2503775 | 6 | 98521600 | G | A | -0.000636566 | 0.000986999 | 0.52 | 33.71 |
| rs28517342 | 6 | 64763297 | G | T | -0.00237422 | 0.000756813 | 0.001 | 30.41 |
| rs297343 | 11 | 16354653 | G | T | -0.000436204 | 0.000690674 | 0.53 | 44.83 |
| rs3012850 | 13 | 58713360 | G | C | 0.00159641 | 0.000787801 | 0.04 | 56.13 |
| rs34961470 | 18 | 52763194 | G | A | -0.000168927 | 0.000692469 | 0.81 | 29.81 |
| rs35856211 | 16 | 74138900 | A | G | -0.00157805 | 0.000667533 | 0.02 | 38.92 |
| rs4243048 | 15 | 78010060 | A | G | 9.97E-05 | 0.0006788 | 0.88 | 35.73 |
| rs4309187 | 11 | 113412443 | C | A | 0.00145677 | 0.000713388 | 0.04 | 63.74 |
| rs4836789 | 9 | 122663466 | C | T | 0.00258379 | 0.000675187 | <0.01 | 45.56 |
| rs55774086 | 16 | 5844481 | G | C | 0.00288985 | 0.000771978 | <0.01 | 40.03 |
| rs55938136 | 17 | 43798360 | G | A | -0.00135858 | 0.000791991 | 0.09 | 86.00 |
| rs56116032 | 9 | 11453149 | G | A | -0.000408975 | 0.000800958 | 0.61 | 53.63 |
| rs57248843 | 13 | 66537882 | T | A | 0.00155231 | 0.00094371 | 0.1 | 44.84 |
| rs6103271 | 20 | 42015848 | G | A | -0.00108029 | 0.00087779 | 0.22 | 42.93 |
| rs62056909 | 17 | 43783803 | G | A | -0.00133529 | 0.000793095 | 0.09 | 88.31 |
| rs6460902 | 7 | 12255511 | A | G | 0.00157188 | 0.000669782 | 0.02 | 37.74 |
| rs67447472 | 6 | 143062216 | T | G | 0.00250757 | 0.00111147 | 0.02 | 39.80 |
| rs67970900 | 4 | 147748826 | T | G | 0.000252275 | 0.000716519 | 0.72 | 35.06 |
| rs6895295 | 5 | 107757238 | T | C | 0.00111551 | 0.000806514 | 0.17 | 30.99 |
| rs7047280 | 9 | 23297808 | T | C | 0.000645253 | 0.000678336 | 0.34 | 33.33 |
| rs72660658 | 4 | 105443124 | T | C | -0.000335064 | 0.000748326 | 0.65 | 33.56 |
| rs72995548 | 11 | 113138921 | T | C | -0.000639493 | 0.00134523 | 0.63 | 39.01 |
| rs7954112 | 12 | 16316338 | A | G | -0.000225956 | 0.000674938 | 0.74 | 30.65 |
| rs931235 | 3 | 65155560 | C | A | -0.00147687 | 0.000675309 | 0.03 | 32.97 |
| rs9517313 | 13 | 99105892 | C | G | -0.000267536 | 0.000680879 | 0.69 | 36.18 |
| rs999483 | 9 | 135301389 | G | T | 0.000980442 | 0.000764748 | 0.2 | 33.43 |

Abbreviation: SNP, single nucleotide polymorphism; Chr, chromosome; SE, standard error.

**Supplementary Table 9: Mendelian randomization analysis of mood instability and bronchiectasis.**

| SNP | Chr | position | Effect allele | Other allele | Beta | SE | P | F |
| --- | --- | --- | --- | --- | --- | --- | --- | --- |
| rs11184994 | 1 | 107383738 | T | C | 0.0202 | 0.0281 | 0.47 | 32.53 |
| rs11712223 | 3 | 116964048 | T | C | -0.0149 | 0.0265 | 0.57 | 36.00 |
| rs11728841 | 4 | 139096299 | C | A | -0.008 | 0.0257 | 0.75 | 30.81 |
| rs12530421 | 6 | 29549443 | C | A | -0.1086 | 0.0515 | 0.03 | 34.13 |
| rs1439252 | 2 | 212737144 | A | G | 0.0099 | 0.0267 | 0.71 | 36.83 |
| rs1688000 | 19 | 35619166 | G | A | 0.0411 | 0.0267 | 0.12 | 34.44 |
| rs2016851 | 14 | 71697878 | C | T | 0.0121 | 0.0278 | 0.66 | 29.91 |
| rs2503775 | 6 | 98521600 | G | A | 0.0244 | 0.0379 | 0.52 | 33.71 |
| rs28517342 | 6 | 64763297 | G | T | -0.0527 | 0.0295 | 0.07 | 30.41 |
| rs28655666 | 12 | 122186317 | A | G | -0.0056 | 0.0255 | 0.83 | 44.65 |
| rs3012850 | 13 | 58713360 | G | C | 0.0146 | 0.0307 | 0.63 | 56.13 |
| rs35856211 | 16 | 74138900 | A | G | 0.0131 | 0.0257 | 0.61 | 38.92 |
| rs4836789 | 9 | 122663466 | C | T | 0.0014 | 0.0261 | 0.96 | 45.56 |
| rs4899532 | 14 | 75174132 | G | A | 0.0127 | 0.0306 | 0.68 | 42.69 |
| rs55938136 | 17 | 43798360 | G | A | -0.0157 | 0.0358 | 0.66 | 86.00 |
| rs613872 | 18 | 53210302 | T | G | 0.0257 | 0.0352 | 0.47 | 63.31 |
| rs61937595 | 12 | 57682956 | T | C | -0.0479 | 0.044 | 0.28 | 30.87 |
| rs62056909 | 17 | 43783803 | G | A | -0.015 | 0.034 | 0.66 | 88.31 |
| rs6460902 | 7 | 12255511 | A | G | 0.0067 | 0.0259 | 0.780 | 37.74 |
| rs6895295 | 5 | 107757238 | T | C | -0.0738 | 0.0326 | 0.02 | 30.99 |
| rs7047280 | 9 | 23297808 | T | C | 5.00E-04 | 0.0261 | 0.99 | 33.33 |
| rs72995548 | 11 | 113138921 | T | C | -0.0973 | 0.0568 | 0.09 | 39.01 |
| rs77087420 | 4 | 123122856 | G | A | -0.0358 | 0.0584 | 0.54 | 30.72 |
| rs7954112 | 12 | 16316338 | A | G | 0.0091 | 0.0263 | 0.73 | 30.65 |
| rs813469 | 12 | 52352449 | A | G | 0.0118 | 0.0315 | 0.71 | 30.72 |
| rs9517313 | 13 | 99105892 | C | G | 0.0219 | 0.026 | 0.40 | 36.18 |
| rs999483 | 9 | 135301389 | G | T | 0.0313 | 0.0294 | 0.29 | 33.43 |

Abbreviation: SNP, single nucleotide polymorphism; Chr, chromosome; SE, standard error.
